# Supplementary material for: Does voluntary practice improve the outcome of an OSCE in undergraduate medical studies? A Propensity Score Matching approach
Source: PubMed Central journal article supplement (PMC11500970; doi:10.1371/journal.pone.0312387), 2024-10-24
Supplement: pone.0312387.s001.pdf [file pone.0312387.s001.pdf]

Does voluntary practice improve the outcome of an OSCE in undergraduate medical studies?  
A Propensity Score Matching approach

Supplementary Information

Supplement 1: Sample representativeness tests

**Table I-1) SOCIODEMOGRAPHIC VARIABLES**

|                         | Study<br>participants | All<br>students | <i>p</i> >T |
|-------------------------|-----------------------|-----------------|-------------|
| Female (%)              | 68.8                  | 65.2            | 0.292       |
| German (%)              | 98.0                  | 94.9            | 0.034       |
| Gymnasium (%)           | 80.8                  | 79.5            | 0.647       |
| GPA                     | 1.56<br>(0.55)        | 1.55<br>(0.57)  | 0.787       |
| Waiting time (years)    | 2.82<br>(3.71)        | 2.43<br>(3.23)  | 0.103       |
| Age                     | 21.94<br>(3.95)       | 21.53<br>(3.56) | 0.126       |
| <b>Admission quota:</b> |                       |                 |             |
| NC (%)                  | 21.95                 | 20.68           | 0.667       |
| WL/PE (%)               | 15.45                 | 10.16           | 0.740       |
| SEL (%)                 | 54.47                 | 53.27           | 0.021       |
| SP (%)                  | 8.13                  | 15.89           | 0.002       |

*Notes:* Study participants' includes all students who filled out the questionnaire and who consented to connecting their answers with data on study success. 'All students' are all OSCE participants in the years 2021-2023, including the study participants. Statistical significance tested with two-sided t-tests. Standard deviations are in parentheses. Admission quotas: NC ('numerous clausus'): applicants admitted directly based on their excellent GPA. WL/PE ('waiting list'/'professional experience'): applicants admitted via a waiting list or via completed vocational training and a study ability test. SEL ('selection'): university-controlled selection procedure that included interviews until 2019 and a combination of GPA, study ability tests, vocational training or a voluntary service since 2020. SP ('special quotas'): for example international (non-EU) students, military doctors or hardship cases.

**Table I-2) OSCE RESULTS**

| OSCE station                 | Study<br>participants | All<br>students | <i>p</i> >T |
|------------------------------|-----------------------|-----------------|-------------|
| Physical examination (%)     | 88.23                 | 87.45           | 0.198       |
| Medical Skills (%)           | 93.25                 | 91.59           | 0.003       |
| Neurological examination (%) | 84.13                 | 82.57           | 0.061       |
| Radiology (%)                | 90.43                 | 87.33           | <0.001      |
| Anamnesis (%)                | 83.50                 | 82.85           | 0.305       |
| Diagnosis (%)                | 84.45                 | 82.74           | 0.010       |
| OSCE overall (%)             | 87.15                 | 85.75           | <0.001      |

*Notes:* Study participants' includes all students who filled out the questionnaire and who consented to connecting their answers with data on study success. 'All students' are all OSCE participants in the years 2021-2023, including the study participants. Statistical significance tested with two-sided t-tests. 'Physical examination': average result in stations internal medicine I – internal medicine III. 'Medical skills': average results in stations medical skills I & II. A structured diagnosis of a X-ray ('Radiology') was not offered for Free Practice in the Skills Lab and is thus not part of this study.

## Supplement 2: Additional descriptive statistics and probit regressions

### II-1) Sociodemographic indicators and free practice

**Table II-1a) FREE PRACTICE AND SOCIODEMOGRAPHIC INDICATORS (t-tests for binary variables)**

|                    | Gender |        |         | Vocational training |        |         | All exams completed |        |         |
|--------------------|--------|--------|---------|---------------------|--------|---------|---------------------|--------|---------|
|                    | male   | female | p-value | no                  | yes    | p-value | no                  | yes    | p-value |
| Free practice (FP) | 79.45% | 93.57% | <0.001  | 95.24%              | 80.39% | <0.001  | 84.96%              | 89.58% | 0.293   |
| FP (frequency)     | 2.53   | 3.54   | 0.005   | 3.58                | 2.72   | 0.012   | 2.77                | 2.79   | 0.209   |
| Phys. Examination  | 44.87% | 59.06% | 0.037   | 57.14%              | 50.98% | 0.339   | 61.95%              | 58.33% | 0.384   |
| Neuro. Examination | 23.08% | 39.77% | 0.010   | 34.01%              | 35.29% | 0.835   | 46.90%              | 37.50% | 0.802   |
| Anamnesis          | 17.95% | 22.81% | 0.387   | 21.09%              | 21.57% | 0.928   | 27.43%              | 35.42% | 0.812   |
| Diagnosis          | 19.23% | 23.98% | 0.408   | 23.13%              | 21.57% | 0.773   | 29.20%              | 39.58% | 0.972   |
| Venipuncture       | 64.10% | 81.87% | 0.002   | 84.35%              | 64.71% | <0.001  | 73.45%              | 72.92% | 0.428   |
| ECG                | 55.13% | 58.48% | 0.622   | 59.86%              | 53.92% | 0.353   | 41.59%              | 43.80% | 0.225   |
| PVC                | 71.79% | 90.64% | <0.001  | 91.84%              | 74.51% | <0.002  | 80.53%              | 87.50% | 0.130   |
| Feeding tube       | 48.72% | 63.16% | 0.032   | 65.99%              | 48.04% | 0.005   | 38.05%              | 70.83% | 0.702   |
| Rectal examination | 32.05% | 41.52% | 0.156   | 44.22%              | 30.39% | 0.028   | 22.12%              | 39.58% | 0.059   |
| Injections         | 41.03% | 58.48% | 0.010   | 62.59%              | 39.22% | <0.001  | 43.36%              | 43.75% | 0.555   |

*Notes:* Binary sociodemographic control variables. 'Vocational training' = 1 if participants reported professional experience in the medical sector, e.g. as paramedics or trained nurses. 'All exams completed' = 1 if all written and oral exams scheduled before the OSCE were also completed before the OSCE. Statistical significance of group-differences is tested with two-sided t-tests. FP: free practice in the Skills Lab; ECG: electrocardiogram; PVC: peripheral venous catheter.

**Table II-1b) FREE PRACTICE & SOCIODEMOGRAPHIC INDICATORS (pairwise correlations for continuous variables)**

|                    | School leaving grade | Average exam grade | Age at enrolment |
|--------------------|----------------------|--------------------|------------------|
| Free practice (FP) | -0.195 (0.002)       | -0.269 (0.000)     | -0.198 (0.002)   |
| FP (frequency)     | -0.235 (0.000)       | -0.248 (0.000)     | -0.117 (0.066)   |
| Phys. Examination  | -0.113 (0.036)       | -0.113 (0.077)     | -0.019 (0.764)   |
| Neuro. Examination | -0.097 (0.126)       | 0.023 (0.720)      | -0.089 (0.160)   |
| Anamnesis          | -0.053 (0.409)       | -0.023 (0.726)     | -0.030 (0.642)   |
| Diagnosis          | -0.069 (0.280)       | -0.042 (0.513)     | -0.051 (0.427)   |
| Venipuncture       | -0.227 (0.003)       | -0.182 (0.004)     | -0.221 (0.000)   |
| ECG                | -0.027 (0.673)       | -0.182 (0.004)     | -0.112 (0.077)   |
| PVC                | -0.207 (0.001)       | -0.266 (0.000)     | -0.211 (0.001)   |
| Feeding tube       | -0.174 (0.006)       | -0.202 (0.002)     | -0.197 (0.002)   |
| Rectal examination | -0.192 (0.002)       | -0.180 (0.005)     | -0.169 (0.008)   |
| Injections         | -0.233 (0.002)       | -0.160 (0.012)     | -0.182 (0.004)   |

*Notes:* Continuous and categorical control variables. 'School leaving grade' in the range of 100 (best) to 400 (worst passing grade). 'Average exam grade' takes the values 1, 2, 3, and 4, equivalent to an A-D grading system. Pearson correlation coefficients are reported. P-values are in parentheses. FP: free practice in the Skills Lab; ECG: electrocardiogram; PVC: peripheral venous catheter.

## II-2) Sociodemographic indicators and OSCE results

**Table II-2a) OSCE RESULTS AND SOCIODEMOGRAPHIC INDICATORS (t-tests)**

|                           | Gender |        |                 | Vocational training |       |                 | All exams completed |       |                 |
|---------------------------|--------|--------|-----------------|---------------------|-------|-----------------|---------------------|-------|-----------------|
|                           | male   | female | <i>p</i> -value | no                  | yes   | <i>p</i> -value | no                  | yes   | <i>p</i> -value |
| OSCE (%)                  | 86.51  | 87.44  | 0.175           | 87.33               | 86.88 | 0.486           | 85.25               | 87.51 | 0.009           |
| Physical exam. (%)        | 86.65  | 88.95  | 0.034           | 89.41               | 86.53 | 0.006           | 85.13               | 88.82 | 0.008           |
| Medical skills (%)        | 93.03  | 93.35  | 0.716           | 92.81               | 93.88 | 0.200           | 91.54               | 93.57 | 0.069           |
| Neurological exam. (%)    | 84.42  | 84.00  | 0.788           | 84.61               | 83.44 | 0.428           | 79.44               | 85.02 | 0.004           |
| Anamnesis & diagnosis (%) | 83.08  | 84.38  | 0.185           | 83.62               | 84.49 | 0.346           | 84.33               | 83.91 | 0.732           |

*Notes:* Binary sociodemographic control variables. 'Vocational training' = 1 if participants reported professional experience in the medical sector, e.g. as paramedics or trained nurses. 'All exams completed' = 1 if all written and oral exams scheduled before the OSCE were also completed before the OSCE. Statistical significance of group-differences is tested with two-sided t-tests. FP: free practice in the Skills Lab; ECG: electrocardiogram; PVC: peripheral venous catheter.

**Table II-2b) MEDICAL SKILLS RESULTS AND SOCIODEMOGRAPHIC INDICATORS (t-tests)**

|                  | Gender |        |                 | Vocational Training |       |                 | All exams completed |       |                 |
|------------------|--------|--------|-----------------|---------------------|-------|-----------------|---------------------|-------|-----------------|
|                  | male   | female | <i>p</i> -value | no                  | yes   | <i>p</i> -value | no                  | yes   | <i>p</i> -value |
| Venipuncture (%) | 94.92  | 95.00  | 0.971           | 94.69               | 95.35 | 0.741           | 96.00               | 94.83 | 0.691           |
| ECG (%)          | 96.00  | 91.90  | 0.263           | 93.19               | 92.00 | 0.683           | 89.33               | 93.14 | 0.379           |
| PVC (%)          | 92.82  | 94.33  | 0.359           | 92.85               | 95.27 | 0.122           | 92.33               | 94.16 | 0.366           |
| Feeding tube (%) | 91.24  | 92.4   | 0.626           | 92.10               | 91.82 | 0.904           | 92.5                | 91.92 | 0.864           |
| Rectal exam. (%) | 90.29  | 91.23  | 0.662           | 91.29               | 90.35 | 0.650           | 91.00               | 90.93 | 0.983           |
| Injections (%)   | 95.85  | 94.39  | 0.406           | 93.71               | 96.46 | 0.098           | 91.79               | 95.75 | 0.042           |

*Notes:* Binary sociodemographic control variables. 'Vocational training' = 1 if participants reported professional experience in the medical sector, e.g. as paramedics or trained nurses. 'All exams completed' = 1 if all written and oral exams scheduled before the OSCE were also completed before the OSCE. Statistical significance of group-differences is tested with two-sided t-tests. FP: free practice in the Skills Lab; ECG: electrocardiogram; PVC: peripheral venous catheter.

**Table II-2c) OSCE RESULTS AND SOCIODEMOGRAPHIC INDICATORS (pairwise correlations)**

|                              | School leaving grade | Avg. Exam grade   | Age               |
|------------------------------|----------------------|-------------------|-------------------|
| OSCE (%)                     | -0.165<br>(0.010)    | -0.422<br>(0.000) | -0.092<br>(0.150) |
| Physical examination (%)     | -0.174<br>(0.006)    | -0.342<br>(0.000) | -0.150<br>(0.019) |
| Medical skills (%)           | -0.014<br>(0.826)    | -0.155<br>(0.015) | 0.067<br>(0.299)  |
| Neurological examination (%) | -0.218<br>(0.001)    | -0.337<br>(0.000) | -0.142<br>(0.026) |
| Anamnesis and diagnosis (%)  | -0.007<br>(0.914)    | -0.189<br>(0.003) | 0.015<br>(0.817)  |

*Notes:* Continuous and categorical control variables. 'School leaving grade' in the range of 100 (best) to 400 (worst passing grade). 'Average exam grade' takes the values 1, 2, 3, and 4, equivalent to an A-D grading system. Pearson correlation coefficients are reported. P-values are in parentheses. FP: free practice in the Skills Lab; ECG: electrocardiogram; PVC: peripheral venous catheter.

**Table II-2d) MEDICAL SKILLS RESULTS AND SOCIODEMOGRAPHIC INDICATORS (pairwise correlations)**

|                        | School<br>leaving grade | Avg. Exam<br>grade | Age               |
|------------------------|-------------------------|--------------------|-------------------|
| Venipuncture (%)       | 0.024<br>(0.826)        | 0.009<br>(0.933)   | 0.102<br>(0.350)  |
| ECG (%)                | 0.190<br>(0.195)        | 0.089<br>(0.549)   | -0.135<br>(0.360) |
| PVC (%)                | 0.056<br>(0.516)        | -0.180<br>(0.037)  | 0.170<br>(0.049)  |
| Feeding tube (%)       | -0.128<br>(0.324)       | -0.098<br>(0.454)  | -0.057<br>(0.664) |
| Rectal examination (%) | -0.182<br>(0.230)       | -0.116<br>(0.448)  | -0.047<br>(0.759) |
| Injections (%)         | 0.041<br>(0.715)        | -0.182<br>(0.099)  | 0.158<br>(0.153)  |

*Notes:* Continuous and categorical control variables. 'School leaving grade' in the range of 100 (best) to 400 (worst passing grade). 'Average exam grade' takes the values 1, 2, 3, and 4, equivalent to an A-D grading system. Pearson correlation coefficients are reported. P-values are in parentheses. FP: free practice in the Skills Lab; ECG: electrocardiogram; PVC: peripheral venous catheter.

### II-3) Probit regressions for propensity scores

**Table II-3a) PROBIT REGRESSIONS FOR PROPENSITY SCORES, PART 1**

|                       | (1)<br>Physical ex-<br>amination<br>Coefficients | (2)<br>Physical ex-<br>amination<br>Margins | (3)<br>Neurological<br>examination<br>Coefficients | (4)<br>Neurological<br>examination<br>Margins | (5)<br>Anamnesis<br>Coefficients | (6)<br>Anamnesis<br>Margins | (7)<br>Diagnosis<br>Coefficients | (8)<br>Diagnosis<br>Margins |
|-----------------------|--------------------------------------------------|---------------------------------------------|----------------------------------------------------|-----------------------------------------------|----------------------------------|-----------------------------|----------------------------------|-----------------------------|
| Vocational training   | 0.141<br>(0.206)                                 | 0.054<br>(0.079)                            | 0.318<br>(0.212)                                   | 0.114<br>(0.075)                              | 0.181<br>(0.230)                 | 0.053<br>(0.067)            | 0.119<br>(0.227)                 | 0.036<br>(0.068)            |
| Abitur grade          | -0.003<br>(0.002)                                | -0.001<br>(0.001)                           | -0.004*<br>(0.002)                                 | -0.001*<br>(0.001)                            | -0.002<br>(0.002)                | -0.001<br>(0.001)           | -0.002<br>(0.002)                | -0.001<br>(0.001)           |
| All exams completed   | 0.006<br>(0.244)                                 | 0.002<br>(0.093)                            | 0.089<br>(0.253)                                   | 0.032<br>(0.090)                              | -0.122<br>(0.271)                | -0.035<br>(0.079)           | -0.105<br>(0.269)                | -0.031<br>(0.081)           |
| Average exam grade    | -0.177<br>(0.129)                                | -0.068<br>(0.049)                           | 0.081<br>(0.132)                                   | 0.029<br>(0.047)                              | -0.061<br>(0.145)                | -0.018<br>(0.042)           | -0.083<br>(0.144)                | -0.025<br>(0.043)           |
| Female                | 0.329<br>(0.178)                                 | 0.126<br>(0.067)                            | 0.448*<br>(0.190)                                  | 0.160*<br>(0.065)                             | 0.162<br>(0.202)                 | 0.047<br>(0.059)            | 0.148<br>(0.199)                 | 0.044<br>(0.059)            |
| Observations          | 245                                              |                                             | 245                                                |                                               | 245                              |                             | 245                              |                             |
| Pseudo R <sup>2</sup> | 0.029                                            |                                             | 0.034                                              |                                               | 0.008                            |                             | 0.008                            |                             |

*Notes:* Probit regressions with the binary indicator Free Practice (FP) yes/no of Physical examination, Neurological examination, Anamnesis, and Diagnosis as dependent variables. Predictors are the five explanatory variables used for the matching. The coefficients in columns (1), (3), (5) and (7) are used to calculate the Propensity Score (PS) in the range [0,1] with Kernel-matching, replacement and a strict requirement of common support. The calculated margins in columns (2), (4), (6) and (8) are not used for matching and are an informative tool: for binary indicators, the margin gives the likelihood of the dependent variable = 1 (in percentage points) in response of the predictor being = 1. For continuous variables, the response (to a one-unit increase in the explanatory variable) is measured in percent. Standard errors are in parentheses. \*:  $p < 0.05$

**Table II-3b) PROBIT REGRESSIONS FOR PROPENSITY SCORES, PART 2**

|                       | (1)<br>Venipuncture<br>Coefficients | (2)<br>Venipuncture<br>Margins | (3)<br>ECG<br>Coefficients | (4)<br>ECG<br>Margins | (5)<br>PVC<br>Coefficients | (6)<br>PVC<br>Margins |
|-----------------------|-------------------------------------|--------------------------------|----------------------------|-----------------------|----------------------------|-----------------------|
| Vocational training   | -0.308<br>(0.413)                   | -0.083<br>(0.111)              | 0.203<br>(0.465)           | 0.074<br>(0.168)      | -0.540<br>(0.338)          | -0.098<br>(0.061)     |
| Abitur grade          | -0.004<br>(0.003)                   | -0.001<br>(0.001)              | 0.006<br>(0.005)           | 0.002<br>(0.002)      | 0.001<br>(0.003)           | 0.000<br>(0.001)      |
| All exams completed   | -0.445<br>(0.481)                   | -0.121<br>(0.128)              | -0.439<br>(0.642)          | -0.160<br>(0.230)     | -0.341<br>(0.435)          | -0.062<br>(0.079)     |
| Average exam grade    | -0.564*<br>(0.252)                  | -0.153*<br>(0.063)             | -0.298<br>(0.323)          | -0.109<br>(0.114)     | -0.770*<br>(0.265)         | -0.140*<br>(0.046)    |
| Female                | 0.460<br>(0.341)                    | 0.125<br>(0.089)               | 0.636<br>(0.562)           | 0.232<br>(0.197)      | 0.872*<br>(0.316)          | 0.158*<br>(0.054)     |
| Observations          | 86                                  |                                | 48                         |                       | 135                        |                       |
| Pseudo R <sup>2</sup> | 0.158                               |                                | 0.074                      |                       | 0.202                      |                       |

*Notes:* Probit regressions with the binary indicator Free Practice (FP) yes/no of the medical skills Venipuncture, ECG (electrocardiogram) and PVC (peripheral venous catheter) as dependent variables. Predictors are the five explanatory variables used for the matching. The coefficients in columns (1), (3) and (5) are used to calculate the Propensity Score (PS) in the range [0,1] with Kernel-matching, replacement and a strict requirement of common support. The calculated margins in columns (2), (4) and (6) are not used for matching and are an informative tool: for binary indicators, the margin gives the likelihood of the dependent variable = 1 (in percentage points) in response of the predictor being = 1. For continuous variables, the response (to a one-unit increase in the explanatory variable) is measured in percent. Standard errors are in parentheses. \*:  $p < 0.05$

**Table II-3c) PROBIT REGRESSIONS FOR PROPENSITY SCORES, PART 3**

|                       | (1)<br>Feeding<br>tube<br>Coefficients | (2)<br>Feeding<br>tube<br>Margins | (3)<br>Rectal ex-<br>amination<br>Coefficients | (4)<br>Rectal ex-<br>amination<br>Margins | (5)<br>Incisions<br>Coefficients | (6)<br>Injections<br>Margins |
|-----------------------|----------------------------------------|-----------------------------------|------------------------------------------------|-------------------------------------------|----------------------------------|------------------------------|
| Vocational training   | 0.324<br>(0.451)                       | 0.112<br>(0.154)                  | 0.406<br>(0.518)                               | 0.137<br>(0.171)                          | -0.117<br>(0.354)                | -0.043<br>(0.129)            |
| Abitur grade          | -0.006<br>(0.004)                      | -0.002<br>(0.001)                 | -0.004<br>(0.005)                              | -0.001<br>(0.002)                         | -0.003<br>(0.004)                | -0.001<br>(0.001)            |
| All exams completed   | -0.127<br>(0.555)                      | -0.044<br>(0.192)                 | -1.220<br>(0.781)                              | -0.410<br>(0.241)                         | -0.010<br>(0.384)                | -0.004<br>(0.141)            |
| Average exam grade    | -0.089<br>(0.290)                      | -0.031<br>(0.100)                 | -0.919*<br>(0.366)                             | -0.309*<br>(0.095)                        | -0.137<br>(0.224)                | -0.050<br>(0.081)            |
| Female                | 0.580<br>(0.366)                       | 0.201<br>(0.118)                  | -0.042<br>(0.484)                              | -0.014<br>(0.163)                         | 0.541<br>(0.308)                 | 0.198<br>(0.106)             |
| Observations          | 61                                     |                                   | 45                                             |                                           | 84                               |                              |
| Pseudo R <sup>2</sup> | 0.080                                  |                                   | 0.145                                          |                                           | 0.058                            |                              |

*Notes:* Probit regressions with the binary indicator Free Practice (FP) yes/no of the medical skills insertion of a Feeding tube, digital rectal examination and (intramuscular) injections as dependent variables. Predictors are the five explanatory variables used for the matching. The coefficients in columns (1), (3) and (5) are used to calculate the Propensity Score (PS) in the range [0,1] with Kernel-matching, replacement and a strict requirement of common support. The calculated margins in columns (2), (4) and (6) are not used for matching and are an informative tool: for binary indicators, the margin gives the likelihood of the dependent variable = 1 (in percentage points) in response of the predictor being = 1. For continuous variables, the response (to a one-unit increase in the explanatory variable) is measured in percent. Standard errors are in parentheses. \*:  $p < 0.05$

# Supplement 3:

## Quality of matching and robustness checks

### III-1) Propensity score tests

The **Tables III-1a – III-1j** give, for each examined part of the OSCE, the composition of the groups FP (‘Free Practice’, i.e., the treatment group) and No FP (the control group) pre (U) and post (M) matching in each of the five sociodemographic variables used for matching. ‘Bias (%)’ refers to the difference between the groups FP and No FP, e.g. in the share of participants reporting vocational training. ‘Reduced bias (%)’ shows how propensity score matching affected the composition of treatment and control group. A negative value in ‘Reduced bias (%)’ means that matching introduced or strengthened group differences in a respective sociodemographic factor. This may happen as the result of the matching algorithm to reduce overall bias over all variables used for matching. Table 3 in the main text shows overall bias pre and post matching for all outcome variables used in this study.

The statistical significance of group differences in **Tables III-1** is tested with two-sided *t*-tests.

**Table III-1a) PS-TESTS PHYSICAL EXAMINATION**

| Variable                      | Matching status | Mean   |        | Bias (%) | Reduced bias (%) | <i>t</i> -test |             |
|-------------------------------|-----------------|--------|--------|----------|------------------|----------------|-------------|
|                               |                 | FP     | No FP  |          |                  | T              | <i>p</i> >T |
| Vocational training (%)       | U               | 38.52  | 43.53  | -10.4    |                  | -0.81          | 0.420       |
|                               | M               | 37.59  | 37.39  | 0.4      | 96.2             | 0.03           | 0.974       |
| School leaving grade (Abitur) | U               | 149.56 | 164.18 | -26.5    |                  | -2.08          | 0.039       |
|                               | M               | 149.85 | 150.25 | -0.7     | 97.3             | -0.07          | 0.948       |
| All exams completed (%)       | U               | 85.93  | 81.81  | 11.1     |                  | 0.87           | 0.384       |
|                               | M               | 85.71  | 85.55  | 0.5      | 95.2             | 0.05           | 0.963       |
| Average grade in exams        | U               | 2.09   | 2.25   | -22.7    |                  | -1.78          | 0.077       |
|                               | M               | 2.11   | 2.12   | -1.9     | 91.6             | -0.16          | 0.872       |
| Female (%)                    | U               | 74.07  | 62.72  | 24.5     |                  | 1.92           | 0.057       |
|                               | M               | 73.68  | 73.32  | 0.8      | 96.8             | 0.07           | 0.946       |

*Notes:* U: unmatched; M: matched. FP: free practice

**Table III-1b) PS-TESTS NEUROLOGICAL EXAMINATION**

| Variable                      | Matching status | Mean   |        | Bias (%) | Reduced bias (%) | <i>t</i> -test |             |
|-------------------------------|-----------------|--------|--------|----------|------------------|----------------|-------------|
|                               |                 | FP     | No FP  |          |                  | T              | <i>p</i> >T |
| Vocational training (%)       | U               | 41.86  | 40.25  | 3.3      |                  | 0.24           | 0.808       |
|                               | M               | 41.86  | 39.38  | 5.0      | -54.4            | 0.33           | 0.742       |
| School leaving grade (Abitur) | U               | 148.95 | 160    | -20.7    |                  | -1.50          | 0.135       |
|                               | M               | 148.95 | 148.97 | -0.0     | 99.8             | -0.00          | 0.998       |
| All exams completed (%)       | U               | 84.88  | 83.65  | 3.4      |                  | 0.25           | 0.802       |
|                               | M               | 84.88  | 84.47  | 1.1      | 66.6             | 0.07           | 0.941       |
| Average grade in exams        | U               | 2.19   | 2.15   | 4.9      |                  | 0.36           | 0.720       |
|                               | M               | 2.19   | 2.20   | -1.7     | 66.1             | -0.11          | 0.915       |
| Female (%)                    | U               | 79.07  | 63.52  | 34.7     |                  | 2.53           | 0.012       |
|                               | M               | 79.07  | 78.92  | 0.3      | 99.0             | 0.02           | 0.980       |

*Notes:* U: unmatched; M: matched. FP: free practice

**Table III-1c) PS-TESTS ANAMNESIS**

| Variable                      | Matching status | Mean   |        | Bias (%) | Reduced Bias (%) | <i>t</i> -test |             |
|-------------------------------|-----------------|--------|--------|----------|------------------|----------------|-------------|
|                               |                 | FP     | No FP  |          |                  | T              | <i>p</i> >T |
| Vocational training (%)       | U               | 41.51  | 40.63  | 1.8      |                  | 0.12           | 0.908       |
|                               | M               | 40.39  | 37.43  | 6.0      | -234.4           | 0.31           | 0.760       |
| School leaving grade (Abitur) | U               | 150.75 | 157.6  | -12.9    |                  | -0.80          | 0.424       |
|                               | M               | 151.54 | 150.41 | 2.1      | 83.5             | 0.12           | 0.908       |
| All exams completed (%)       | U               | 83.02  | 84.38  | -3.6     |                  | -0.24          | 0.812       |
|                               | M               | 84.62  | 84.04  | 1.6      | 57.3             | 0.08           | 0.936       |
| Average grade in exams        | U               | 2.13   | 2.17   | -5.6     |                  | -0.35          | 0.726       |
|                               | M               | 2.12   | 2.15   | -5.5     | 1.3              | -0.28          | 0.780       |
| Female (%)                    | U               | 73.59  | 67.71  | 12.9     |                  | 0.82           | 0.415       |
|                               | M               | 73.08  | 72.96  | 0.3      | 98.0             | 0.01           | 0.989       |

Notes: U: unmatched; M: matched. FP: free practice

**Table III-1d) PS-TESTS DIAGNOSIS**

| Variable                      | Matching status | Mean   |        | Bias (%) | Reduced Bias (%) | <i>t</i> -test |             |
|-------------------------------|-----------------|--------|--------|----------|------------------|----------------|-------------|
|                               |                 | FP     | No FP  |          |                  | T              | <i>p</i> >T |
| Vocational training (%)       | U               | 39.29  | 41.27  | -4.0     |                  | -0.26          | 0.792       |
|                               | M               | 39.29  | 38.21  | 2.2      | 45.8             | 0.12           | 0.908       |
| School leaving grade (Abitur) | U               | 149.29 | 158.15 | -16.6    |                  | -1.06          | 0.291       |
|                               | M               | 149.29 | 149.45 | -0.3     | 98.1             | -0.02          | 0.986       |
| All exams completed (%)       | U               | 83.93  | 84.13  | -0.5     |                  | -0.04          | 0.972       |
|                               | M               | 83.93  | 83.72  | 0.6      | -7.9             | 0.03           | 0.976       |
| Average grade in exams        | U               | 2.11   | 2.18   | -10.2    |                  | -0.66          | 0.513       |
|                               | M               | 2.11   | 2.15   | -6.5     | 36.8             | -0.34          | 0.732       |
| Female (%)                    | U               | 73.21  | 67.73  | 12.0     |                  | 0.78           | 0.437       |
|                               | M               | 73.21  | 72.73  | 1.1      | 91.2             | 0.06           | 0.954       |

Notes: U: unmatched; M: matched. FP: free practice

**Table III-1e) PS-TESTS MEDICAL SKILL: VENIPUNCTURE**

| Variable                      | Matching status | Mean   |        | Bias (%) | Reduced Bias (%) | <i>t</i> -test |             |
|-------------------------------|-----------------|--------|--------|----------|------------------|----------------|-------------|
|                               |                 | FP     | No FP  |          |                  | T              | <i>p</i> >T |
| Vocational training (%)       | U               | 34.92  | 65.22  | -62.6    |                  | -2.58          | 0.012       |
|                               | M               | 52.94  | 47.33  | 11.6     | 81.5             | 0.46           | 0.650       |
| School leaving grade (Abitur) | U               | 142.06 | 183.04 | -68.4    |                  | -3.06          | 0.003       |
|                               | M               | 160    | 158.58 | 2.4      | 96.5             | 0.11           | 0.912       |
| All exams completed (%)       | U               | 87.30  | 86.96  | 1.0      |                  | 0.04           | 0.967       |
|                               | M               | 82.35  | 90.29  | -23.3    | -2198.9          | -0.94          | 0.349       |
| Average grade in exams        | U               | 1.94   | 2.39   | -70.8    |                  | -2.66          | 0.009       |
|                               | M               | 2.38   | 2.27   | 17.0     | 76.0             | 0.84           | 0.402       |
| Female (%)                    | U               | 74.60  | 56.52  | 38.1     |                  | 1.62           | 0.109       |
|                               | M               | 67.65  | 62.48  | 10.9     | 71.4             | 0.44           | 0.660       |

Notes: U: unmatched; M: matched. FP: free practice

**Table III-1f) PS-TESTS MEDICAL SKILL: ECG**

| Variable                      | Matching status | Mean   |        |          | Reduced Bias (%) | t-test |       |
|-------------------------------|-----------------|--------|--------|----------|------------------|--------|-------|
|                               |                 | FP     | No FP  | Bias (%) |                  | T      | p>T   |
| Vocational training (%)       | U               | 53.85  | 31.82  | 44.7     |                  | 1.54   | 0.131 |
|                               | M               | 40.00  | 33.24  | 13.7     | 69.3             | 0.43   | 0.667 |
| School leaving grade (Abitur) | U               | 168.46 | 144.55 | 44.6     |                  | 1.52   | 0.136 |
|                               | M               | 147    | 147.88 | -1.6     | 96.3             | -0.06  | 0.951 |
| All exams completed (%)       | U               | 84.62  | 90.91  | -18.9    |                  | -0.65  | 0.521 |
|                               | M               | 85.00  | 87.60  | -7.8     | 58.8             | -0.23  | 0.817 |
| Average grade in exams        | U               | 2      | 2      | 0.0      |                  | -0.00  | 1.000 |
|                               | M               | 1.95   | 1.95   | 0.5      |                  | 0.02   | 0.987 |
| Female (%)                    | U               | 84.62  | 77.27  | 18.4     |                  | 0.64   | 0.526 |
|                               | M               | 80.00  | 82.72  | -6.8     | 62.9             | -0.22  | 0.830 |

Notes: U: unmatched; M: matched. FP: free practice

**Table III-1g) PS-TESTS MEDICAL SKILL: PVC**

| Variable                      | Matching status | Mean   |        |          | Reduced Bias (%) | t-test |       |
|-------------------------------|-----------------|--------|--------|----------|------------------|--------|-------|
|                               |                 | FP     | No FP  | Bias (%) |                  | T      | p>T   |
| Vocational training (%)       | U               | 36.21  | 68.42  | -67.1    |                  | -2.70  | 0.008 |
|                               | M               | 46.67  | 36.00  | 22.2     | 66.9             | 1.45   | 0.148 |
| School leaving grade (Abitur) | U               | 156.47 | 180.53 | -42.8    |                  | -1.80  | 0.074 |
|                               | M               | 162.22 | 184.94 | -40.4    | 5.6              | -2.43  | 0.016 |
| All exams completed (%)       | U               | 83.62  | 73.68  | 24.0     |                  | 1.05   | 0.297 |
|                               | M               | 81.11  | 81.02  | 0.2      | 99.1             | 0.02   | 0.987 |
| Average grade in exams        | U               | 2.16   | 2.74   | -70.9    |                  | -3.30  | 0.001 |
|                               | M               | 2.32   | 2.39   | -7.8     | 88.9             | -0.64  | 0.523 |
| Female (%)                    | U               | 71.55  | 42.11  | 61.2     |                  | 2.58   | 0.011 |
|                               | M               | 63.33  | 62.02  | 2.7      | 95.5             | 0.18   | 0.856 |

Notes: U: unmatched; M: matched. FP: free practice. PVC: peripheral venous catheter.

**Table III-1h) PS-TESTS MEDICAL SKILL: FEEDING TUBE**

| Variable                      | Matching status | Mean   |        |          | Reduced Bias (%) | t-test |       |
|-------------------------------|-----------------|--------|--------|----------|------------------|--------|-------|
|                               |                 | FP     | No FP  | Bias (%) |                  | T      | p>T   |
| Vocational training (%)       | U               | 34.21  | 39.13  | -10.0    |                  | -0.38  | 0.704 |
|                               | M               | 31.03  | 36.29  | -10.7    | -6.8             | -0.42  | 0.678 |
| School leaving grade (Abitur) | U               | 144.47 | 171.3  | -45.7    |                  | -1.79  | 0.078 |
|                               | M               | 152.41 | 158.74 | -10.8    | 76.4             | -0.45  | 0.657 |
| All exams completed (%)       | U               | 86.84  | 86.96  | -0.3     |                  | -0.01  | 0.990 |
|                               | M               | 89.66  | 86.46  | 9.3      | -2690.8          | 0.37   | 0.714 |
| Average grade in exams        | U               | 2.11   | 2.22   | -16.0    |                  | -0.60  | 0.551 |
|                               | M               | 2.31   | 2.12   | 27.1     | -69.4            | 1.08   | 0.283 |
| Female (%)                    | U               | 73.68  | 52.17  | 44.9     |                  | 1.73   | 0.089 |
|                               | M               | 65.52  | 65.30  | 0.4      | 99.0             | 0.02   | 0.987 |

Notes: U: unmatched; M: matched. FP: free practice



**Table III-1i) PS-TESTS MEDICAL SKILL: RECTAL EXAMINATION**

| Variable                      | Matching status | Mean   |        |          | Reduced Bias (%) | t-test |       |
|-------------------------------|-----------------|--------|--------|----------|------------------|--------|-------|
|                               |                 | FP     | No FP  | Bias (%) |                  | T      | p>T   |
| Vocational training (%)       | U               | 36.36  | 39.13  | -5.6     |                  | -0.19  | 0.852 |
|                               | M               | 38.46  | 26.51  | 24.1     | -332.1           | 0.63   | 0.534 |
| School leaving grade (Abitur) | U               | 148.18 | 156.09 | -13.5    |                  | -0.45  | 0.652 |
|                               | M               | 150    | 141.41 | 14.7     | -8.7             | 0.41   | 0.687 |
| All exams completed (%)       | U               | 86.36  | 95.65  | -32.2    |                  | -1.08  | 0.284 |
|                               | M               | 92.31  | 97.71  | -18.7    | 41.9             | -0.61  | 0.546 |
| Average grade in exams        | U               | 2      | 2.43   | -71.8    |                  | -2.42  | 0.020 |
|                               | M               | 2.31   | 2.23   | 12.8     | 82.2             | 0.43   | 0.672 |
| Female (%)                    | U               | 68.18  | 69.57  | -2.9     |                  | -0.10  | 0.922 |
|                               | M               | 69.23  | 67.31  | 4.0      | -38.5            | 0.10   | 0.920 |

Notes: U: unmatched; M: matched. FP: free practice

**Table III-1j) PS-TESTS MEDICAL SKILL: INJECTIONS**

| Variable                      | Matching status | Mean   |        |          | Reduced Bias (%) | t-test |       |
|-------------------------------|-----------------|--------|--------|----------|------------------|--------|-------|
|                               |                 | FP     | No FP  | Bias (%) |                  | T      | p>T   |
| Vocational training (%)       | U               | 34.69  | 51.43  | -33.9    |                  | -1.54  | 0.128 |
|                               | M               | 34.69  | 35.98  | -2.6     | 92.3             | -0.13  | 0.895 |
| School leaving grade (Abitur) | U               | 147.76 | 165.43 | -35.3    |                  | -1.62  | 0.108 |
|                               | M               | 147.76 | 149.58 | -3.6     | 89.7             | -0.19  | 0.849 |
| All exams completed (%)       | U               | 79.59  | 74.29  | 12.5     |                  | 0.57   | 0.572 |
|                               | M               | 79.59  | 79.09  | 1.2      | 90.5             | 0.06   | 0.951 |
| Average grade in exams        | U               | 2.14   | 2.34   | -26.0    |                  | -1.18  | 0.240 |
|                               | M               | 2.14   | 2.13   | 1.4      | 94.7             | 0.07   | 0.945 |
| Female (%)                    | U               | 75.51  | 57.14  | 39.1     |                  | 1.79   | 0.077 |
|                               | M               | 75.51  | 76.60  | -2.3     | 94.1             | -0.12  | 0.901 |

Notes: U: unmatched; M: matched. FP: free practice

### III-2) Propensity score graphs

The histograms in Figure III-2 show, for each part of the OSCE, the frequency of propensity scores for the control group ('No FP', gray bars), the treatment group ('FP', black bars) with matched counterparts in the control group, and subjects with FP who did not have a matched partner and were thus excluded from the analysis.

Generally, when propensity scores lie in the same range and are comparably frequent, subjects are fairly similar with respect to the covariates used for matching. In our case this is in particular the case with larger number of observations, e.g. panels a) – d) in Fig. III-2.

Fig. III-2 is in essence a graphical representation of Tables III-1 in this Attachment and of Table 3 in the main text.

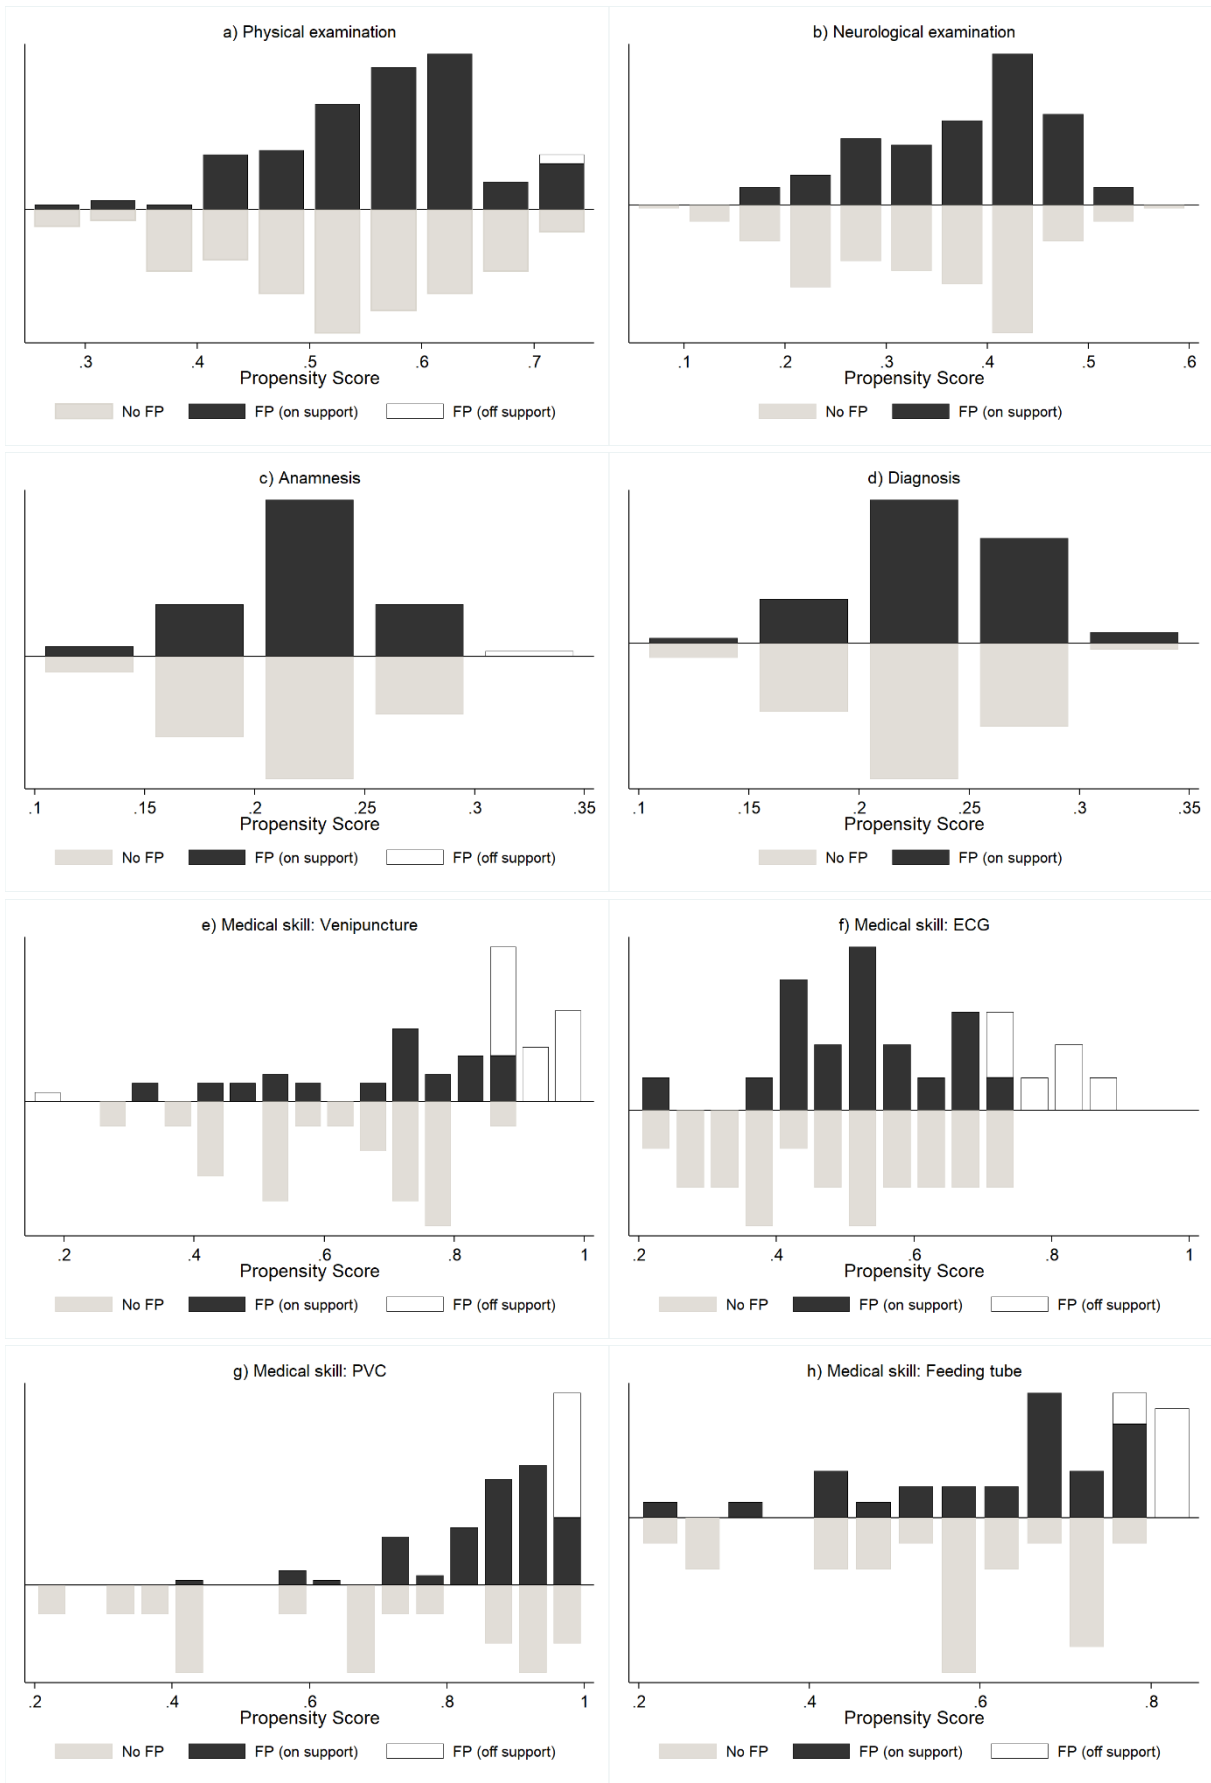

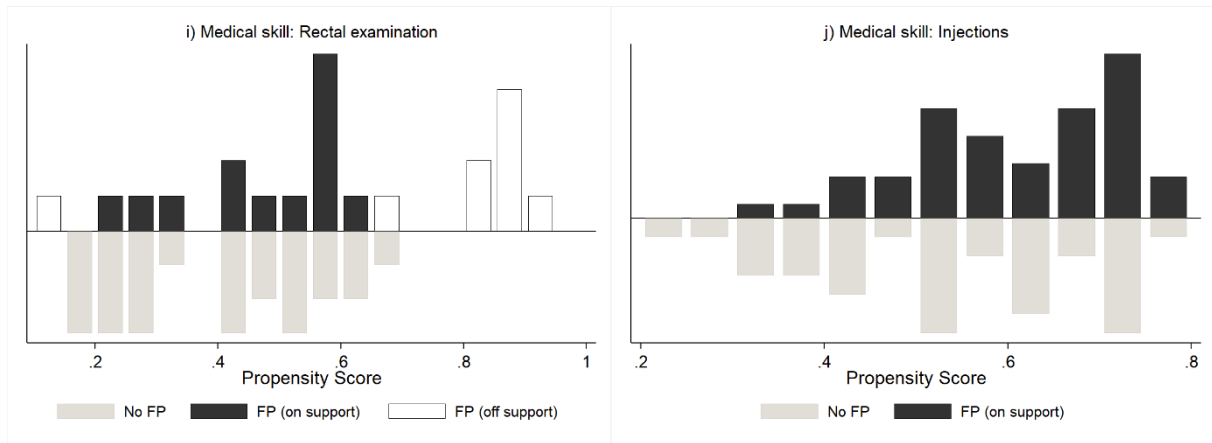

Figure III-2) PROPENSITY SCORE GRAPHS

### III-3) Rosenbaum-Bounds

The aim of Propensity Score Matching is to draw causal inferences from observational data. However, even after a successful matching, this is connected to a statistical uncertainty that is hard to quantify. In our study, we balanced some factors we identified as potential confounders, but could not include others, e.g. because they were unobservable to us. Thus, potential selection biases in the data could only be partially reduced.

With sensitivity analyses in this section we model how strongly unobserved covariates can be biased before the treatment effects we identified with PSM (see Table 2 in the main text) become insignificant.

In **Tables III-3**, we use Rosenbaum-Bounds (Rosenbaum, 2002; DiPrete & Gangl, 2004) to test the robustness of treatment effects.  $\Gamma$  (Gamma) in the tables is the Odds-Ratio of subjects' allocation to the treatment (FP) and control group (No FP), which is influenced by observed and unobserved characteristics. A  $\Gamma$  of 1 is the equivalent of a randomized sample, i.e. where there is no difference between treatment and control group and where there is no confounding. Thus, the larger  $\Gamma$ , the larger the modeled imbalance between treatment and control group (Müller, 2012). A treatment effect is 'robust' if the null hypothesis (assuming that the entire effect is the result of confounding) cannot be rejected even for larger  $\Gamma$ . Aakvik (2001) described significant treatment effects with a  $\Gamma$  of 2 as very robust.

In the Tables III-3 we test the robustness of the ATT (Average treatment effect on the treated) from our PSM (see Table 2 in the main text) up to  $\Gamma=2$ . Of major importance and indicated in bold letters is the upper-bound significance level (sig+), which tests positive selection bias and thus an over-estimation of treatment effects.

In contrast to PSM, Rosenbaum-Bounds are median-based. Thus, the significance level in Tables III-3 and Table 2 in the main text can deviate (Mueller, 2012).

With respect to robustness, the treatment effects in our study fall in three broad categories. First, for some OSCE-stations and skills, FP has a large effect on OSCE performance even when we model large confounding. These are 'Physical examination' (Table III-3a), PVC (III-

3g), rectal examination (III-3i) and injections (III-3j). Second, there are OSCE stations in which FP has no effect on exam success regardless how equal or unequal treatment and control group are. These cases are ‘Neurological examination’, ‘Anamnesis’ and ‘Diagnosis’ (Tables III-3b-d). Third, for the medical skills ‘Venipuncture’ and ‘ECG’ treatment effects become significant only when large confounding is modeled. This suggests that the small observed differences between FP and No FP are explained by unobserved factors we consequentially could not use for matching.

Overall, the sensitivity checks imply that our matching is statistically robust, because mostly positive treatment effects either remain significant or never become significant.

**Table III-3a) ROSENBAUM-BOUNDS PHYSICAL EXAMINATION**

| $\Gamma$   | sig+          | sig-   | t-hat+ | t-hat- | CI+    | CI-    |
|------------|---------------|--------|--------|--------|--------|--------|
| <b>1</b>   | <b>0.0000</b> | 0.0000 | 5.3943 | 5.3943 | 4.0753 | 6.6145 |
| <b>1.1</b> | <b>0.0000</b> | 0.0000 | 5.1048 | 5.7000 | 3.7653 | 6.9245 |
| <b>1.2</b> | <b>0.0000</b> | 0.0000 | 4.8184 | 5.9455 | 3.4323 | 7.1785 |
| <b>1.3</b> | <b>0.0000</b> | 0.0000 | 4.5257 | 6.2328 | 3.1131 | 7.4118 |
| <b>1.4</b> | <b>0.0000</b> | 0.0000 | 4.2737 | 6.4315 | 2.8079 | 7.6524 |
| <b>1.5</b> | <b>0.0000</b> | 0.0000 | 4.0373 | 6.6417 | 2.5638 | 7.8452 |
| <b>1.6</b> | <b>0.0000</b> | 0.0000 | 3.8534 | 6.8373 | 2.3492 | 8.0202 |
| <b>1.7</b> | <b>0.0000</b> | 0.0000 | 3.6468 | 7.0378 | 2.0658 | 8.2439 |
| <b>1.8</b> | <b>0.0000</b> | 0.0000 | 3.4395 | 7.1785 | 1.8196 | 8.3897 |
| <b>1.9</b> | <b>0.0002</b> | 0.0000 | 3.2218 | 7.3209 | 1.6212 | 8.5327 |
| <b>2</b>   | <b>0.0004</b> | 0.0000 | 3.0517 | 7.4667 | 1.4279 | 8.6470 |

*Notes:*  $\Gamma$ : log odds of differential assignment due to unobserved factors; sig+: upper bound significance level; sig-: lower bound significance level; t-hat+: upper bound Hodges-Lehman point estimate; t-hat-: lower bound Hodges-Lehman point estimate; CI+: upper bound 95%-confidence interval; CI-: lower bound 95%-confidence interval.

**Table III-3b) ROSENBAUM-BOUNDS NEUROLOGICAL EXAMINATION**

| $\Gamma$   | sig+          | sig-   | t-hat+  | t-hat- | CI+     | CI-    |
|------------|---------------|--------|---------|--------|---------|--------|
| <b>1</b>   | <b>0.0259</b> | 0.0259 | 2.2074  | 2.207  | -0.0279 | 4.8076 |
| <b>1.1</b> | <b>0.0591</b> | 0.0099 | 1.6493  | 2.6224 | -0.4439 | 5.2360 |
| <b>1.2</b> | <b>0.1118</b> | 0.0036 | 1.2696  | 3.1702 | -0.8581 | 5.7096 |
| <b>1.3</b> | <b>0.1837</b> | 0.0013 | 0.9203  | 3.6204 | -1.2899 | 6.1412 |
| <b>1.4</b> | <b>0.2708</b> | 0.0004 | 0.6095  | 4.0108 | -1.6446 | 6.4914 |
| <b>1.5</b> | <b>0.3669</b> | 0.0001 | 0.3782  | 4.3897 | -1.9951 | 6.7442 |
| <b>1.6</b> | <b>0.4650</b> | 0.0000 | 0.0739  | 4.6750 | -2.4992 | 7.1136 |
| <b>1.7</b> | <b>0.5593</b> | 0.0000 | -0.2251 | 4.9601 | -2.8829 | 7.4172 |
| <b>1.8</b> | <b>0.6453</b> | 0.0000 | -0.3999 | 5.1866 | -3.2441 | 7.7034 |
| <b>1.9</b> | <b>0.7205</b> | 0.0000 | -0.6207 | 5.4661 | -3.5110 | 7.9579 |
| <b>2</b>   | <b>0.7839</b> | 0.0000 | -0.8581 | 5.7119 | -3.9376 | 8.2271 |

*Notes:*  $\Gamma$ : log odds of differential assignment due to unobserved factors; sig+: upper bound significance level; sig-: lower bound significance level; t-hat+: upper bound Hodges-Lehman point estimate; t-hat-: lower bound Hodges-Lehman point estimate; CI+: upper bound 95%-confidence interval; CI-: lower bound 95%-confidence interval.

**Table III-3c) ROSENBAUM-BOUNDS ANAMNESIS**

| $\Gamma$ | sig+          | sig-    | t-hat+  | t-hat- | CI+     | CI-    |
|----------|---------------|---------|---------|--------|---------|--------|
| 1        | <b>0.2589</b> | 0.25895 | 0.8352  | 0.8352 | -1.9401 | 3.4530 |
| 1.1      | <b>0.3638</b> | 0.1720  | 0.5304  | 1.1853 | -2.4182 | 3.7509 |
| 1.2      | <b>0.4695</b> | 0.1108  | 0.1127  | 1.5201 | -2.8082 | 4.0381 |
| 1.3      | <b>0.5688</b> | 0.0698  | -0.2384 | 1.9380 | -3.1935 | 4.3023 |
| 1.4      | <b>0.6572</b> | 0.0430  | -0.4809 | 2.2022 | -3.5720 | 4.6008 |
| 1.5      | <b>0.7327</b> | 0.0262  | -0.7845 | 2.5389 | -3.8815 | 4.9574 |
| 1.6      | <b>0.7949</b> | 0.0157  | -1.0546 | 2.7485 | -4.1797 | 5.2428 |
| 1.7      | <b>0.8449</b> | 0.0093  | -1.4182 | 2.9341 | -4.4852 | 5.5129 |
| 1.8      | <b>0.8842</b> | 0.0055  | -1.6808 | 3.1965 | -4.7905 | 5.8344 |
| 1.9      | <b>0.9144</b> | 0.0032  | -1.9366 | 3.4232 | -5.0241 | 6.0391 |
| 2        | <b>0.9373</b> | 0.0018  | -2.1682 | 3.5674 | -5.2486 | 6.2960 |

Notes:  $\Gamma$ : log odds of differential assignment due to unobserved factors; sig+: upper bound significance level; sig-: lower bound significance level; t-hat+: upper bound Hodges-Lehman point estimate; t-hat-: lower bound Hodges-Lehman point estimate; CI+: upper bound 95%-confidence interval; CI-: lower bound 95%-confidence interval.

**Table III-3d) ROSENBAUM-BOUNDS DIAGNOSIS**

| $\Gamma$ | sig+          | sig-   | t-hat+  | t-hat- | CI+     | CI-    |
|----------|---------------|--------|---------|--------|---------|--------|
| 1        | <b>0.2623</b> | 0.2623 | 0.8100  | 0.8100 | -1.6586 | 2.9268 |
| 1.1      | <b>0.3720</b> | 0.1717 | 0.1631  | 1.0193 | -1.9816 | 3.1151 |
| 1.2      | <b>0.4821</b> | 0.1088 | 0.0382  | 1.2954 | -2.1876 | 3.6057 |
| 1.3      | <b>0.5850</b> | 0.0671 | -0.1292 | 1.7600 | -2.8291 | 3.8556 |
| 1.4      | <b>0.6755</b> | 0.0404 | -0.4192 | 1.9261 | -2.9476 | 4.0683 |
| 1.5      | <b>0.7515</b> | 0.0234 | -0.8768 | 2.0742 | -3.1038 | 4.2954 |
| 1.6      | <b>0.8132</b> | 0.0140 | -1.0561 | 2.2954 | -3.2524 | 4.6390 |
| 1.7      | <b>0.8618</b> | 0.008  | -1.1454 | 2.7669 | -3.6695 | 4.8870 |
| 1.8      | <b>0.8992</b> | 0.0046 | -1.3343 | 2.8816 | -3.9714 | 5.0085 |
| 1.9      | <b>0.9273</b> | 0.0026 | -1.7524 | 2.9634 | -4.1163 | 5.1381 |
| 2        | <b>0.9481</b> | 0.0015 | -1.9285 | 3.0765 | -4.2217 | 5.5088 |

Notes:  $\Gamma$ : log odds of differential assignment due to unobserved factors; sig+: upper bound significance level; sig-: lower bound significance level; t-hat+: upper bound Hodges-Lehman point estimate; t-hat-: lower bound Hodges-Lehman point estimate; CI+: upper bound 95%-confidence interval; CI-: lower bound 95%-confidence interval.

**Table III-3e) ROSENBAUM-BOUNDS VENIPUNCTURE**

| $\Gamma$ | sig+          | sig-   | t-hat+  | t-hat-  | CI+     | CI-    |
|----------|---------------|--------|---------|---------|---------|--------|
| 1        | <b>0.1892</b> | 0.1892 | -1.6970 | -1.6970 | -5.6970 | 1.7878 |
| 1.1      | <b>0.1309</b> | 0.2605 | -2.2024 | -0.8822 | -6.000  | 1.9115 |
| 1.2      | <b>0.0894</b> | 0.3355 | -2.7898 | -0.4175 | -6.3909 | 2.6946 |
| 1.3      | <b>0.0604</b> | 0.4107 | -3.0373 | -0.2622 | -6.8271 | 2.8239 |
| 1.4      | <b>0.0405</b> | 0.4833 | -3.5615 | 0.0000  | -8.0000 | 3.0151 |
| 1.5      | <b>0.0269</b> | 0.5514 | -4.2122 | 0.3030  | -8.2024 | 3.2170 |
| 1.6      | <b>0.0178</b> | 0.6139 | -4.2122 | 0.7102  | -8.2622 | 3.2252 |
| 1.7      | <b>0.0118</b> | 0.6701 | -4.3909 | 1.1080  | -8.4592 | 3.3934 |
| 1.8      | <b>0.0077</b> | 0.7120 | -4.3915 | 1.2102  | -8.8598 | 3.3963 |
| 1.9      | <b>0.0051</b> | 0.7636 | -4.5432 | 1.2873  | -9.6713 | 3.5132 |
| 2        | <b>0.0033</b> | 0.8014 | -4.7127 | 1.6085  | -10.000 | 3.5727 |

Notes:  $\Gamma$ : log odds of differential assignment due to unobserved factors; sig+: upper bound significance level; sig-: lower bound significance level; t-hat+: upper bound Hodges-Lehman point estimate; t-hat-: lower bound Hodges-Lehman point estimate; CI+: upper bound 95%-confidence interval; CI-: lower bound 95%-confidence interval.

**Table III-3f) ROSENBAUM-BOUNDS ECG**

| $\Gamma$ | sig+          | sig-   | t-hat+  | t-hat-  | CI+     | CI-    |
|----------|---------------|--------|---------|---------|---------|--------|
| 1        | <b>0.3203</b> | 0.3203 | -1.0591 | -1.0591 | -7.7543 | 4.6514 |
| 1.1      | <b>0.2568</b> | 0.3892 | -1.9901 | -0.9923 | -8.4992 | 4.9985 |
| 1.2      | <b>0.2047</b> | 0.4552 | -2.5105 | -0.2078 | -8.9444 | 5.4467 |
| 1.3      | <b>0.1625</b> | 0.5169 | -3.2767 | 0.1620  | -9.9974 | 6.1216 |
| 1.4      | <b>0.1286</b> | 0.5739 | -3.8125 | 0.23239 | -10.527 | 6.3933 |
| 1.5      | <b>0.1015</b> | 0.6256 | -4.0347 | 0.91324 | -11.243 | 6.7446 |
| 1.6      | <b>0.0800</b> | 0.6721 | -4.4469 | 1.4387  | -11.277 | 7.4387 |
| 1.7      | <b>0.0629</b> | 0.7137 | -4.5613 | 1.4895  | -11.474 | 7.6322 |
| 1.8      | <b>0.0494</b> | 0.7506 | -4.9632 | 1.6326  | -12.000 | 7.7788 |
| 1.9      | <b>0.0388</b> | 0.7832 | -4.9985 | 2.1753  | -12.491 | 8.3060 |
| 2        | <b>0.0304</b> | 0.8118 | -5.1267 | 2.2613  | -12.713 | 8.8774 |

Notes:  $\Gamma$ : log odds of differential assignment due to unobserved factors; sig+: upper bound significance level; sig-: lower bound significance level; t-hat+: upper bound Hodges-Lehman point estimate; t-hat-: lower bound Hodges-Lehman point estimate; CI+: upper bound 95%-confidence interval; CI-: lower bound 95%-confidence interval.

**Table III-3g) ROSENBAUM-BOUNDS PVC**

| $\Gamma$ | sig+          | sig-   | t-hat+  | t-hat-  | CI+    | CI-     |
|----------|---------------|--------|---------|---------|--------|---------|
| 1        | <b>0.0000</b> | 0.0000 | 11.019  | 11.019  | 9.1447 | 12.6334 |
| 1.1      | <b>0.0000</b> | 0.0000 | 10.7025 | 11.3875 | 8.7222 | 12.9491 |
| 1.2      | <b>0.0000</b> | 0.0000 | 10.4639 | 11.6986 | 8.3795 | 13.2788 |
| 1.3      | <b>0.0000</b> | 0.0000 | 10.104  | 11.9867 | 8.0309 | 13.5494 |
| 1.4      | <b>0.0000</b> | 0.0000 | 9.8117  | 12.2215 | 7.7452 | 13.7834 |
| 1.5      | <b>0.0000</b> | 0.0000 | 9.522   | 12.4538 | 7.3714 | 14.0576 |
| 1.6      | <b>0.0000</b> | 0.0000 | 9.1794  | 12.5765 | 6.9698 | 14.2554 |
| 1.7      | <b>0.0000</b> | 0.0000 | 8.9548  | 12.7652 | 6.6855 | 14.4481 |
| 1.8      | <b>0.0000</b> | 0.0000 | 8.7222  | 12.9578 | 6.5200 | 14.5825 |
| 1.9      | <b>0.0000</b> | 0.0000 | 8.5653  | 13.1447 | 6.1831 | 14.7652 |
| 2        | <b>0.0000</b> | 0.0000 | 8.3292  | 13.3124 | 5.9764 | 14.8854 |

Notes:  $\Gamma$ : log odds of differential assignment due to unobserved factors; sig+: upper bound significance level; sig-: lower bound significance level; t-hat+: upper bound Hodges-Lehman point estimate; t-hat-: lower bound Hodges-Lehman point estimate; CI+: upper bound 95%-confidence interval; CI-: lower bound 95%-confidence interval. PVC: Peripheral venous catheter.

**Table III-3h) ROSENBAUM-BOUNDS FEEDING TUBE**

| $\Gamma$ | sig+          | sig-   | t-hat+ | t-hat- | CI+     | CI-    |
|----------|---------------|--------|--------|--------|---------|--------|
| 1        | <b>0.0245</b> | 0.0245 | 3.8368 | 3.8368 | 0.0000  | 6.1225 |
| 1.1      | <b>0.0404</b> | 0.0141 | 3.6059 | 3.9486 | -0.2899 | 6.4545 |
| 1.2      | <b>0.0609</b> | 0.0081 | 3.1237 | 4.3008 | -0.5060 | 6.8269 |
| 1.3      | <b>0.0857</b> | 0.0046 | 2.5961 | 4.4444 | -0.6473 | 7.1237 |
| 1.4      | <b>0.1146</b> | 0.0026 | 2.1309 | 4.6184 | -0.8296 | 7.5789 |
| 1.5      | <b>0.1467</b> | 0.0015 | 1.8506 | 4.7845 | -0.9413 | 7.8369 |
| 1.6      | <b>0.1815</b> | 0.0009 | 1.4311 | 4.9135 | -1.0833 | 8.0264 |
| 1.7      | <b>0.2183</b> | 0.0005 | 1.3119 | 5.0100 | -1.1985 | 8.3500 |
| 1.8      | <b>0.2564</b> | 0.0003 | 1.1075 | 5.1298 | -1.3029 | 8.7258 |
| 1.9      | <b>0.2955</b> | 0.0002 | 0.8901 | 5.3285 | -1.4649 | 8.9090 |
| 2        | <b>0.3343</b> | 0.0001 | 0.7785 | 5.4557 | -1.5614 | 9.0539 |

Notes:  $\Gamma$ : log odds of differential assignment due to unobserved factors; sig+: upper bound significance level; sig-: lower bound significance level; t-hat+: upper bound Hodges-Lehman point estimate; t-hat-: lower bound Hodges-Lehman point estimate; CI+: upper bound 95%-confidence interval; CI-: lower bound 95%-confidence interval.

**Table III-3i) ROSENBAUM-BOUNDS RECTAL EXAMINATION**

| $\Gamma$   | sig+          | sig-   | t-hat+ | t-hat- | CI+     | CI-     |
|------------|---------------|--------|--------|--------|---------|---------|
| <b>1</b>   | <b>0.0095</b> | 0.0095 | 4.1764 | 4.1764 | 0.1763  | 8.6020  |
| <b>1.1</b> | <b>0.0141</b> | 0.0062 | 4.1764 | 4.3059 | 0.1764  | 8.8985  |
| <b>1.2</b> | <b>0.0195</b> | 0.0041 | 4.1549 | 4.4302 | 0.1764  | 9.0276  |
| <b>1.3</b> | <b>0.0259</b> | 0.0027 | 3.8254 | 4.6020 | -0.1746 | 9.3559  |
| <b>1.4</b> | <b>0.0329</b> | 0.0018 | 3.4271 | 4.8558 | -0.1746 | 10.2779 |
| <b>1.5</b> | <b>0.0407</b> | 0.0012 | 3.1802 | 5.5344 | -0.2524 | 10.6059 |
| <b>1.6</b> | <b>0.0497</b> | 0.0008 | 2.9309 | 5.6161 | -0.5256 | 11.0315 |
| <b>1.7</b> | <b>0.0579</b> | 0.0005 | 2.9264 | 5.7197 | -1.6230 | 11.6485 |
| <b>1.8</b> | <b>0.0672</b> | 0.0003 | 2.9264 | 5.9814 | -2.7487 | 12.877  |
| <b>1.9</b> | <b>0.0769</b> | 0.0002 | 2.5754 | 6.2549 | -3.0024 | 12.8985 |
| <b>2</b>   | <b>0.0868</b> | 0.0002 | 1.8096 | 6.6059 | -3.0024 | 13.0354 |

*Notes:*  $\Gamma$ : log odds of differential assignment due to unobserved factors; sig+: upper bound significance level; sig-: lower bound significance level; t-hat+: upper bound Hodges-Lehman point estimate; t-hat-: lower bound Hodges-Lehman point estimate; CI+: upper bound 95%-confidence interval; CI-: lower bound 95%-confidence interval.

**Table III-3j) ROSENBAUM-BOUNDS INJECTIONS**

| $\Gamma$   | sig+          | sig-   | t-hat+ | t-hat- | CI+    | CI-    |
|------------|---------------|--------|--------|--------|--------|--------|
| <b>1</b>   | <b>0.0000</b> | 0.0000 | 6.7427 | 6.7427 | 5.4343 | 8.0664 |
| <b>1.1</b> | <b>0.0000</b> | 0.0000 | 6.6088 | 6.8715 | 5.1641 | 8.2110 |
| <b>1.2</b> | <b>0.0000</b> | 0.0000 | 6.4721 | 7.0875 | 5.0516 | 8.3029 |
| <b>1.3</b> | <b>0.0000</b> | 0.0000 | 6.3660 | 7.2832 | 4.7406 | 8.3783 |
| <b>1.4</b> | <b>0.0000</b> | 0.0000 | 6.1833 | 7.4931 | 4.6221 | 8.4704 |
| <b>1.5</b> | <b>0.0000</b> | 0.0000 | 6.0578 | 7.5427 | 4.4535 | 8.6457 |
| <b>1.6</b> | <b>0.0000</b> | 0.0000 | 5.9188 | 7.6721 | 4.3882 | 8.7914 |
| <b>1.7</b> | <b>0.0000</b> | 0.0000 | 5.7877 | 7.7257 | 4.0469 | 8.8864 |
| <b>1.8</b> | <b>0.0000</b> | 0.0000 | 5.7056 | 7.8776 | 3.7877 | 9.0217 |
| <b>1.9</b> | <b>0.0001</b> | 0.0000 | 5.4931 | 8.0072 | 3.6944 | 9.1572 |
| <b>2</b>   | <b>0.0001</b> | 0.0000 | 5.3663 | 8.0953 | 3.4559 | 9.2386 |

*Notes:*  $\Gamma$ : log odds of differential assignment due to unobserved factors; sig+: upper bound significance level; sig-: lower bound significance level; t-hat+: upper bound Hodges-Lehman point estimate; t-hat-: lower bound Hodges-Lehman point estimate; CI+: upper bound 95%-confidence interval; CI-: lower bound 95%-confidence interval.

## References

AAKVIK, A. (2001) Bounding a matching estimator: The case of a Norwegian training program. OXFORD BULLETIN OF ECONOMICS AND STATISTICS 63: 115-143.

DiPRETE, T.A. & GANGL, M. (2004) Assessing bias in the estimation of causal effects: Rosenbaum bounds on matching estimators and instrumental variables estimation with imperfect instruments. SOCIOLOGICAL METHODOLOGY 34: 271-310.

ROSENBAUM, P.R. (2002) Observational studies. New York: Springer (2<sup>nd</sup> ed.)

MÜLLER, C.E. (2012). Quasiexperimentelle Wirkungsevaluation mit Propensity Score Matching: ein Leitfaden für die Umsetzung mit Stata. CEVal-ARBEITSPAPIER 19.

## Supplement 4: English translation of the questionnaire

The following pages show the English translation of all items included in the 2023 version of the online-questionnaire sent to students. The original, German online version was distributed via Email.

Questionnaires in earlier years varied slightly, e.g. because the items polling for Free Practice outside the Skills Lab were not yet included.

Not all items included in the questionnaire were ultimately utilized/analyzed for this study.

### 1. Introduction

Dear student. With this short questionnaire we would like to record your motives for using the MHH Skills Lab and your competencies in certain practical skills. In order to optimize the Skills Lab and adapt it to your needs, we would like to link your information and experiences with your results in the upcoming OSCE. We will ask for your consent at the end of the questionnaire.

Your data will be anonymized by the Office of the Dean of Studies, used exclusively for research purposes and not passed on to third parties. The data will only be processed by the Office of the Dean of Studies and will not be passed on to the lecturers or teaching staff involved.

Even if you did not visit the Skills Lab for Free Practice, your information is very valuable! Thank you for your cooperation!

### 2. Free Practice in the Summer Term 2023

2.1 Have you used the Skills Lab for Free Practice in this summer term?  
(yes/no)

2.2 How often have you used the Skills Lab for Free Practice in this summer term?  
(once, twice, 3, 4, ..., 10, >10 times)  
*Question only activated when the answer to 2.1 was (yes)*

2.3 What have you practiced on these occasions? (Multiple responses possible)  
(venipuncture, ECG diagnosis, physical examination, conducting an anamnesis, neurological examination, conveying a diagnosis, placement of a peripheral venous catheter, placement of a feeding tube, digital-rectal examination, subcutaneous/intramuscular injection, other)  
*Question only activated when the answer to 2.1 was (yes)*

2.4 Please specify "other".  
(Text box)  
*Question only activated if the box "other" was ticked in question 2.3*



- 2.5 Have you practiced one or several of the following skills in other places than the Skills Lab (e.g. with friends or family)? (Multiple responses possible)  
(physical examination, neurological examination, conducting an anamnesis, conveying a diagnosis)
- 2.6 Here you can give details where and with whom you practiced outside the Skills Lab.  
(Text box)  
*Question only activated if one of the boxes in 2.5 was checked.*
- 2.7 How often have you practiced these skills outside the Skills Lab?  
(once, twice, 3, 4, ..., 10, >10 times)  
*Question only activated if one of the boxes in 2.5 was checked.*

### **3. Free practice in earlier semesters**

- 3.1 Have you used the Skills Lab for Free Practice once or several times before this summer term?  
(yes/no)
- 3.2 How often have you used the Skills Lab for Free Practice before this summer term?  
(once, twice, 3, 4, ..., 10, >10 times)  
*Question only activated when the answer to 3.1 was (yes)*
- 3.3 What have you practiced on these occasions? (Multiple responses possible)  
(venipuncture, ECG diagnosis, physical examination, conducting an anamnesis, neurological examination, conveying a diagnosis, placement of a peripheral venous catheter, placement of a feeding tube, digital-rectal examination, subcutaneous/intramuscular injection, other)  
*Question only activated when the answer to 3.1 was (yes)*
- 3.4 Please specify "other".  
(Text box)  
*Question only activated if the box "other" was ticked in question 3.3*

#### **4. Information on the use of the Skills Lab**

Why do you use the Skills Lab for Free Practice, respectively why would you use them?  
(Six-point scale in the range from “does not apply at all” to “fully applies”)

- 4.1 General preparation for the OSCE
- 4.2 Uncertainty regarding certain practical skills
- 4.3 Refreshing what I have learned
- 4.4 General interest without specific reference to the OSCE
- 4.5 Preparation for clinical traineeships
- 4.6 Because practical skills are insufficiently taught in the curriculum

#### **5. Other information**

- 5.1 Did you complete vocational training in adjacent healthcare professions before starting your studies?  
(yes/no)
- 5.2 In which adjacent healthcare profession have you completed vocational training?  
(Multiple responses possible)  
(nursing, medical technician, paramedic, another profession)  
*Question only activated when the answer to 5.1 was (yes)*
- 5.3 Have you worked in your training occupation?  
(yes/no)  
*Question only activated when the answer to 5.1 was (yes)*
- 5.4 Did you start or complete another degree before enrolling in your studies at MHH?  
(yes/no)
- 5.5 Are there medical role models in your family?  
(yes/no)
- 5.6 Are there medical role models in your circle of friends or acquaintances?  
(yes/no)

Which of the following areas would you like to work in later?  
(Six-point scale in the range from “very much” to “very reluctantly”)

- 5.7 In an university hospital
- 5.8 In a non-university hospital
- 5.9 In a specials medical practice
- 5.10 In a general medical practice
- 5.11 As a researcher

- 5.12 In the pharmaceutical industry
- 5.13 In medical technology
- 5.14 In another field (Text box)

## **6. Declaration of consent**

- 6.1 I agree that my information from this questionnaire can be linked to my examination results from the OSCE.  
(yes/no)

Thank you for your participation!

*(if answer to 6.1 was "yes")*

Thank you for your participation. Your answers will not be linked to your OSCE results.

*(if answer to 6.1 was "no")*
